# Supplementary material for: Screening of Neutrophil Activating Factors from a Metagenome Library of Sponge-Associated Bacteria
Source: MDPI journal article supplement (doi:10.3390/md19080427), 2021-07-28
Supplement: s1 [file s1]

**Screening of Neutrophil Activating Factors from a Metagenome  
Library of Sponge-Associated Bacteria (TENTATIVE)**

Yoshiko Okamura, Hirokazu Takahashi, Atsuyuki Shiida, Yuto Hirata, Haruko  
Takeyama, Katsuhiko Suzuki

Supplemental Figures and Tables

Supplemental Table S1. List of selected clones by *in silico* screening

| Clone # | Register # | Originated library    | annotation                                                                             |  |  |  |  |  |  |
|---------|------------|-----------------------|----------------------------------------------------------------------------------------|--|--|--|--|--|--|
| 1       | 201-B10    | Styllisa massa Fosmid | Ubiquitin-protein ligase                                                               |  |  |  |  |  |  |
| 2       | 204-H07    | Styllisa massa Fosmid | D-alanine-D-alanine ligase and related ATP-grasp enzymes                               |  |  |  |  |  |  |
| 3       | 96-E02     | Hytios erecta plasmid | D-alanine-D-alanine ligase and related ATP-grasp enzymes                               |  |  |  |  |  |  |
| 4       | 314-A11    | Styllisa massa Fosmid | Ubiquitin-protein ligase                                                               |  |  |  |  |  |  |
| 5       | 165-G12    | Styllisa massa Fosmid | PPE-repeat proteins; Predicted ATPase (AAA+ superfamily)                               |  |  |  |  |  |  |
| 6       | 167-H02    | Styllisa massa Fosmid | Predicted ATPase (AAA+ superfamily)                                                    |  |  |  |  |  |  |
| 7       | 168-F05    | Styllisa massa Fosmid | D-alanine-D-alanine ligase and related ATP-grasp enzymes                               |  |  |  |  |  |  |
| 8       | 101-F08    | Styllisa massa Fosmid | UDP-N-acetylmuramyl pentapeptide synthase                                              |  |  |  |  |  |  |
| 9       | 101-A09    | Styllisa massa Fosmid | UDP-N-acetylmuramyl pentapeptide synthase                                              |  |  |  |  |  |  |
| 10      | 224-H06    | Styllisa massa Fosmid | UDP-N-acetylmuramyl pentapeptide synthase                                              |  |  |  |  |  |  |
| 11      | 97-D01     | Styllisa massa Fosmid | MoxR-like ATPases; AAA ATPase containing von Willebrand factor type A (vWA) domain     |  |  |  |  |  |  |
| 12      | 97-G03     | Styllisa massa Fosmid | Phosphoribosylaminoimidazole (AIR) synthetase                                          |  |  |  |  |  |  |
| 13      | 372-F11    | Styllisa massa Fosmid | Folate-dependent phosphoribosylglycinamide formyltransferase PurN                      |  |  |  |  |  |  |
| 14      | 40-F03     | Hytios erecta plasmid | Non-ribosomal peptide synthetase modules and related proteins                          |  |  |  |  |  |  |
| 15      | 62-E09     | Hytios erecta plasmid | UDP-N-acetylmuramyl pentapeptide synthase                                              |  |  |  |  |  |  |
| 16      | 63-E06     | Hytios erecta plasmid | Folypolyglutamate synthase                                                             |  |  |  |  |  |  |
| 17      | 65-F04     | Hytios erecta plasmid | UDP-N-acetylmuramylalanine-D-glutamate ligase                                          |  |  |  |  |  |  |
| 18      | 66-D10     | Hytios erecta plasmid | D-alanine-D-alanine ligase and related ATP-grasp enzymes                               |  |  |  |  |  |  |
| 19      | 67-B03     | Hytios erecta plasmid | UDP-N-acetylmuramylalanine-D-glutamate ligase                                          |  |  |  |  |  |  |
| 20      | 24-H07     | Hytios erecta plasmid | Folypolyglutamate synthase                                                             |  |  |  |  |  |  |
| 21      | 27-G11     | Hytios erecta plasmid | UDP-N-acetylmuramyl pentapeptide synthase                                              |  |  |  |  |  |  |
| 22      | 28-F03     | Hytios erecta plasmid | Predicted unusual protein kinase                                                       |  |  |  |  |  |  |
| 23      | 30-B01     | Hytios erecta plasmid | UDP-N-acetylmuramylalanine-D-glutamate ligase                                          |  |  |  |  |  |  |
| 24      | 31-F12     | Hytios erecta plasmid | UDP-N-acetylmuramate-alanine ligase                                                    |  |  |  |  |  |  |
| 25      | 201-F06    | Hytios erecta plasmid | Non-ribosomal peptide synthetase modules and related proteins                          |  |  |  |  |  |  |
| 26      | 22-D07     | Hytios erecta plasmid | Non-ribosomal peptide synthetase modules and related proteins                          |  |  |  |  |  |  |
| 27      | 23-D12     | Hytios erecta plasmid | UDP-N-acetylmuramylalanine-D-glutamate ligase                                          |  |  |  |  |  |  |
| 28      | 81-G09     | Hytios erecta plasmid | UDP-N-acetylmuramate-alanine ligase                                                    |  |  |  |  |  |  |
| 29      | 85-B10     | Hytios erecta plasmid | Non-ribosomal peptide synthetase modules and related proteins                          |  |  |  |  |  |  |
| 30      | 85-D06     | Hytios erecta plasmid | UDP-N-acetylmuramyl tripeptide synthase; UDP-N-acetylmuramylalanine-D-glutamate ligase |  |  |  |  |  |  |
| 31      | 89-B02     | Hytios erecta plasmid | Non-ribosomal peptide synthetase modules and related proteins                          |  |  |  |  |  |  |
| 32      | 91-C11     | Hytios erecta plasmid | Formyltetrahydrofolate synthetase                                                      |  |  |  |  |  |  |
| 33      | 93-D03     | Hytios erecta plasmid | D-alanine-D-alanine ligase and related ATP-grasp enzymes                               |  |  |  |  |  |  |
| 34      | 179-F03    | Styllisa massa Fosmid | D-alanine-D-alanine ligase and related ATP-grasp enzymes                               |  |  |  |  |  |  |
| 35      | 181-F01    | Styllisa massa Fosmid | Folypolyglutamate synthase                                                             |  |  |  |  |  |  |
| 36      | 181-G02    | Styllisa massa Fosmid | Folate-dependent phosphoribosylglycinamide formyltransferase PurN                      |  |  |  |  |  |  |
| 37      | 189-B09    | Hytios erecta plasmid | UDP-N-acetylmuramate-alanine ligase                                                    |  |  |  |  |  |  |
| 38      | 192-B03    | Hytios erecta plasmid | UDP-N-acetylmuramyl tripeptide synthase                                                |  |  |  |  |  |  |
| 39      | 193-C12    | Hytios erecta plasmid | Non-ribosomal peptide synthetase modules and related proteins                          |  |  |  |  |  |  |
| 40      | 204-G09    | Hytios erecta plasmid | Non-ribosomal peptide synthetase modules and related proteins                          |  |  |  |  |  |  |
| 41      | 206-H01    | Hytios erecta plasmid | Folypolyglutamate synthase                                                             |  |  |  |  |  |  |
| 42      | 210-D04    | Hytios erecta plasmid | Formyltetrahydrofolate synthetase                                                      |  |  |  |  |  |  |
| 43      | 210-D11    | Hytios erecta plasmid | Folypolyglutamate synthase                                                             |  |  |  |  |  |  |
| 44      | 212-G09    | Hytios erecta plasmid | Folypolyglutamate synthase                                                             |  |  |  |  |  |  |
| 45      | 213-G03    | Hytios erecta plasmid | UDP-N-acetylmuramyl tripeptide synthase; UDP-N-acetylmuramyl pentapeptide synthase     |  |  |  |  |  |  |
| 46      | 214-H01    | Hytios erecta plasmid | Folypolyglutamate synthase                                                             |  |  |  |  |  |  |
| 47      | 2-B09      | Hytios erecta plasmid | Formyltetrahydrofolate synthetase                                                      |  |  |  |  |  |  |
| 48      | 4-C03      | Hytios erecta plasmid | UDP-N-acetylmuramyl pentapeptide synthase                                              |  |  |  |  |  |  |
| 49      | 4-D10      | Hytios erecta plasmid | UDP-N-acetylmuramylalanine-D-glutamate ligase                                          |  |  |  |  |  |  |
| 50      | 6-H02      | Hytios erecta plasmid | D-alanine-D-alanine ligase and related ATP-grasp enzymes                               |  |  |  |  |  |  |
| 51      | 12-C03     | Hytios erecta plasmid | Formyltetrahydrofolate synthetase                                                      |  |  |  |  |  |  |
| 52      | 13-A04     | Hytios erecta plasmid | D-alanine-D-alanine ligase and related ATP-grasp enzymes                               |  |  |  |  |  |  |
| 53      | 33-C05     | Hytios erecta plasmid | Non-ribosomal peptide synthetase modules and related proteins                          |  |  |  |  |  |  |
| 54      | 38-F05     | Hytios erecta plasmid | Folate-dependent phosphoribosylglycinamide formyltransferase PurN                      |  |  |  |  |  |  |
| 55      | 52-C04     | Hytios erecta plasmid | UDP-N-acetylmuramyl pentapeptide synthase                                              |  |  |  |  |  |  |
| 56      | 54-D09     | Hytios erecta plasmid | Folypolyglutamate synthase                                                             |  |  |  |  |  |  |
| 57      | 54-F05     | Hytios erecta plasmid | UDP-N-acetylmuramyl tripeptide synthase                                                |  |  |  |  |  |  |
| 58      | 58-C04     | Hytios erecta plasmid | Formyltetrahydrofolate synthetase                                                      |  |  |  |  |  |  |
| 59      | 69-B06     | Hytios erecta plasmid | Folate-dependent phosphoribosylglycinamide formyltransferase PurN                      |  |  |  |  |  |  |
| 60      | 72-E08     | Hytios erecta plasmid | D-alanine-D-alanine ligase and related ATP-grasp enzymes                               |  |  |  |  |  |  |
| 61      | 73-B12     | Hytios erecta plasmid | D-alanine-D-alanine ligase and related ATP-grasp enzymes                               |  |  |  |  |  |  |
| 62      | 73-H09     | Hytios erecta plasmid | UDP-N-acetylmuramylalanine-D-glutamate ligase                                          |  |  |  |  |  |  |
| 63      | 78-C05     | Hytios erecta plasmid | UDP-N-acetylmuramyl tripeptide synthase                                                |  |  |  |  |  |  |
| 64      | 96-D08     | Hytios erecta plasmid | D-alanine-D-alanine ligase and related ATP-grasp enzymes                               |  |  |  |  |  |  |
| 65      | 96-E02     | Hytios erecta plasmid | D-alanine-D-alanine ligase and related ATP-grasp enzymes                               |  |  |  |  |  |  |
| 66      | 97-B04     | Hytios erecta plasmid | Non-ribosomal peptide synthetase modules and related proteins; Peptide arylamidases    |  |  |  |  |  |  |
| 67      | 100-G12    | Hytios erecta plasmid | 5-formyltetrahydrofolate cycle-ligase                                                  |  |  |  |  |  |  |
| 68      | 139-F08    | Hytios erecta plasmid | D-alanine-D-alanine ligase and related ATP-grasp enzymes                               |  |  |  |  |  |  |
| 69      | 141-C04    | Hytios erecta plasmid | UDP-N-acetylmuramylalanine-D-glutamate ligase                                          |  |  |  |  |  |  |
| 70      | 143-C01    | Hytios erecta plasmid | Non-ribosomal peptide synthetase modules and related proteins                          |  |  |  |  |  |  |
| 71      | 143-G03    | Hytios erecta plasmid | UDP-N-acetylmuramyl pentapeptide synthase; UDP-N-acetylmuramyl tripeptide synthase     |  |  |  |  |  |  |
| 72      | 186-F06    | Hytios erecta plasmid | Folate-dependent phosphoribosylglycinamide formyltransferase PurN                      |  |  |  |  |  |  |
| 73      | 103-C09    | Hytios erecta plasmid | D-alanine-D-alanine ligase and related ATP-grasp enzymes                               |  |  |  |  |  |  |
| 74      | 104-D10    | Hytios erecta plasmid | Folate-dependent phosphoribosylglycinamide formyltransferase PurN                      |  |  |  |  |  |  |
| 75      | 104-F11    | Hytios erecta plasmid | UDP-N-acetylmuramyl tripeptide synthase                                                |  |  |  |  |  |  |
| 76      | 105-F10    | Hytios erecta plasmid | Formyltetrahydrofolate synthetase                                                      |  |  |  |  |  |  |
| 77      | 112-A08    | Hytios erecta plasmid | UDP-N-acetylmuramylalanine-D-glutamate ligase                                          |  |  |  |  |  |  |
| 78      | 114-G03    | Hytios erecta plasmid | UDP-N-acetylmuramylalanine-D-glutamate ligase                                          |  |  |  |  |  |  |
| 79      | 114-C10    | Hytios erecta plasmid | UDP-N-acetylmuramyl pentapeptide synthase                                              |  |  |  |  |  |  |
| 80      | 120-F09    | Hytios erecta plasmid | D-alanine-D-alanine ligase and related ATP-grasp enzymes                               |  |  |  |  |  |  |
| 81      | 121-F11    | Hytios erecta plasmid | Folypolyglutamate synthase                                                             |  |  |  |  |  |  |
| 82      | 123-H09    | Hytios erecta plasmid | Non-ribosomal peptide synthetase modules and related proteins;                         |  |  |  |  |  |  |
| 83      | 125-D02    | Hytios erecta plasmid | Formyltetrahydrofolate synthetase                                                      |  |  |  |  |  |  |
| 84      | 129-A07    | Hytios erecta plasmid | UDP-N-acetylmuramyl tripeptide synthase                                                |  |  |  |  |  |  |
| 85      | 137-B09    | Hytios erecta plasmid | UDP-N-acetylmuramyl tripeptide synthase; UDP-N-acetylmuramyl pentapeptide synthase     |  |  |  |  |  |  |
| 86      | 140-B04    | Hytios erecta plasmid | D-alanine-D-alanine ligase and related ATP-grasp enzymes                               |  |  |  |  |  |  |
| 87      | 18-C04     | Hytios erecta plasmid | D-alanine-D-alanine ligase and related ATP-grasp enzymes                               |  |  |  |  |  |  |
| 88      | 146-C03    | Hytios erecta plasmid | UDP-N-acetylmuramyl pentapeptide synthase                                              |  |  |  |  |  |  |
| 89      | 147-E02    | Hytios erecta plasmid | UDP-N-acetylmuramyl pentapeptide synthase                                              |  |  |  |  |  |  |
| 90      | 147-F11    | Hytios erecta plasmid | UDP-N-acetylmuramylalanine-D-glutamate ligase                                          |  |  |  |  |  |  |
| 91      | 150-F01    | Hytios erecta plasmid | UDP-N-acetylmuramyl tripeptide synthase                                                |  |  |  |  |  |  |
| 92      | 152-E10    | Hytios erecta plasmid | UDP-N-acetylmuramyl tripeptide synthase                                                |  |  |  |  |  |  |
| 93      | 161-B04    | Hytios erecta plasmid | UDP-N-acetylmuramate-alanine ligase                                                    |  |  |  |  |  |  |
| 94      | 164-H10    | Hytios erecta plasmid | D-alanine-D-alanine ligase and related ATP-grasp enzymes                               |  |  |  |  |  |  |
| 95      | 165-H12    | Hytios erecta plasmid | Folypolyglutamate synthase                                                             |  |  |  |  |  |  |
| 96      | 169-H12    | Hytios erecta plasmid | UDP-N-acetylmuramylalanine-D-glutamate ligase                                          |  |  |  |  |  |  |
| 97      | 174-A03    | Hytios erecta plasmid | Folypolyglutamate synthase                                                             |  |  |  |  |  |  |
| 98      | 183-A02    | Hytios erecta plasmid | Non-ribosomal peptide synthetase modules and related proteins;                         |  |  |  |  |  |  |
| 99      | 178-A01    | Hytios erecta plasmid | Predicted ATPase (AAA+ superfamily)                                                    |  |  |  |  |  |  |
| 100     | 175-G11    | Hytios erecta plasmid | D-alanine-D-alanine ligase and related ATP-grasp enzymes                               |  |  |  |  |  |  |
| 101     | 181-H05    | Hytios erecta plasmid | D-alanine-D-alanine ligase and related ATP-grasp enzymes                               |  |  |  |  |  |  |
| 102     | 184-F03    | Hytios erecta plasmid | D-alanine-D-alanine ligase and related ATP-grasp enzymes                               |  |  |  |  |  |  |
| 103     | 180-A04    | Hytios erecta plasmid | FOG: Arkyrin repeat                                                                    |  |  |  |  |  |  |
| 104     | 180-B10    | Hytios erecta plasmid | Non-ribosomal peptide synthetase modules and related proteins;                         |  |  |  |  |  |  |
| 105     | 171-F08    | Hytios erecta plasmid | Formyltetrahydrofolate synthetase                                                      |  |  |  |  |  |  |
| 106     | 22-F10     | Hytios erecta plasmid | D-alanine-D-alanine ligase and related ATP-grasp enzymes                               |  |  |  |  |  |  |
| 107     | 20-D11     | Hytios erecta plasmid | UDP-N-acetylmuramyl tripeptide synthase                                                |  |  |  |  |  |  |
| 108     | 19-A04     | Hytios erecta plasmid | Formyltetrahydrofolate synthetase                                                      |  |  |  |  |  |  |
| 109     | 45-H06     | Hytios erecta plasmid | Predicted unusual protein kinase                                                       |  |  |  |  |  |  |
| 110     | 53-F11     | Hytios erecta plasmid | UDP-N-acetylmuramyl tripeptide synthase                                                |  |  |  |  |  |  |
| 111     | 61-G06     | Hytios erecta plasmid | Folate-dependent phosphoribosylglycinamide formyltransferase PurN                      |  |  |  |  |  |  |
| 112     | 59-G11     | Hytios erecta plasmid | Folate-dependent phosphoribosylglycinamide formyltransferase PurN                      |  |  |  |  |  |  |
| 113     | 57-H05     | Hytios erecta plasmid | UDP-N-acetylmuramate-alanine ligase                                                    |  |  |  |  |  |  |
| 114     | 05-H04     | Hytios erecta plasmid | D-alanine-D-alanine ligase and related ATP-grasp enzymes                               |  |  |  |  |  |  |
| 115     | 32-F04     | Hytios erecta plasmid | UDP-N-acetylmuramyl tripeptide synthase                                                |  |  |  |  |  |  |
| 116     | 34-D08     | Hytios erecta plasmid | Non-ribosomal peptide synthetase modules and related proteins                          |  |  |  |  |  |  |
| 117     | 39-H09     | Hytios erecta plasmid | UDP-N-acetylmuramyl pentapeptide synthase                                              |  |  |  |  |  |  |
| 118     | 40-D11     | Hytios erecta plasmid | UDP-N-acetylmuramyl tripeptide synthase                                                |  |  |  |  |  |  |
| 119     | 41-B06     | Hytios erecta plasmid | UDP-N-acetylmuramyl tripeptide synthase; UDP-N-acetylmuramyl pentapeptide synthase     |  |  |  |  |  |  |
| 120     | 42-H04     | Hytios erecta plasmid | Formyltetrahydrofolate synthetase                                                      |  |  |  |  |  |  |

Supplemental Table S2. List of primers designed for gene expression

| No. | Name                 | sequence                                                            |
|-----|----------------------|---------------------------------------------------------------------|
| 1   | EcoRI_ORF1_-2F       | GAG AGA <u>GAA TTC</u> TCA GTG CTC GAG GCC TCG TCC CAT GGC          |
| 2   | EcoRI_ORF2_1F        | GAG AGA <u>GAA TTC</u> ATG CAC TCC TGG TTG CCG GCA AGG GGC          |
| 3   | EcoRI_ORF3_1F        | GAG AGA <u>GAA TTC</u> ATG CCG GCC GCC ACT TCA GCG GCC GTA TTC      |
| 4   | EcoRI_ORF4_1F        | GAG AGA <u>GAA TTC</u> ATG CTG TTC CAT TTC CTG GTT CCG CTC          |
| 5   | NotI_ORF1_754R       | GAG AGA <u>GCG GCC GCT</u> CAG GCG CTC CCC GCA GCA CCG GCA CG       |
| 5   | SbfI(PstI)_ORF1_754R | GAG AGA <u>CCT GCA GGT</u> CAG GCG CTC CCC GCA GCA CCG GCA CG       |
| 6   | XhoI_ORF2_456R       | GAG AGA <u>CTC GAG</u> TCA GCT CCT TGG TGC CGG TCT TGC CGA C        |
| 7   | NotI_ORF3_936R       | GAG AGA <u>GCG GCC GCT</u> CAG TGC GCC TTC GAC CCG GTG ACC CG       |
| 7   | SbfI(PstI)_ORF3_936R | GAG AGA <u>CCT GCA GGT</u> CAG TGC GCC TTC GAC CCG GTG ACC CG       |
| 8   | NotI-PstI_ORF4_693R  | GAG AGA <u>GCG GCC GCC</u> TGC AGA TAG TCC GCA AAG AAC GCG TTG      |
| 2   | EcoRI_ORF2_pHSG398   | GAG AGA <u>GAA TTC</u> AAT GCA CTC CTG GTT GCC GGC AAG GGG C        |
| 3   | EcoRI_ORF3_pHSG398   | GAG AGA <u>GAA TTC</u> AAT GCC GGC CGC CAC TTC AGC GGC CGT ATT<br>C |
| 4   | EcoRI_ORF4_pHSG398   | GAG AGA <u>GAA TTC</u> AAT GCT GTT CCA TTT CCT GGT TCC GCT C        |
| 9   | M13-P8               | AGC GGA TAA CAA TTT CAC ACA GGA AAC                                 |
| 10  | M13-P7               | CGC CAG GGT TTT CCC AGT CAC GAC                                     |

The restriction enzyme recognition sequence was indicated by underline.

M13-P8 and M13-P7 are primers derived from the vector sequence, and the restriction enzyme digestion site used is the sequence in the multi-cloning site of the vector.

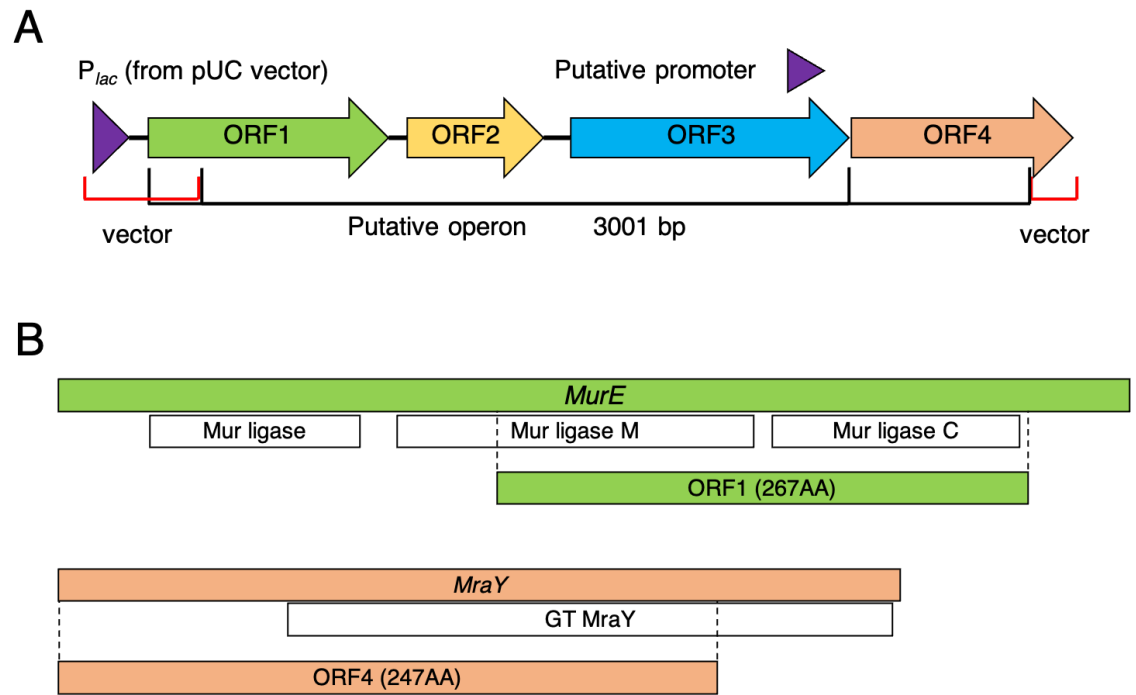

Figure S1. Arrangement of the open reading frames in the metagenomic fragment of clone #115 (A) and the truncated regions of homologous proteins in ORF1 and ORF4 (B).

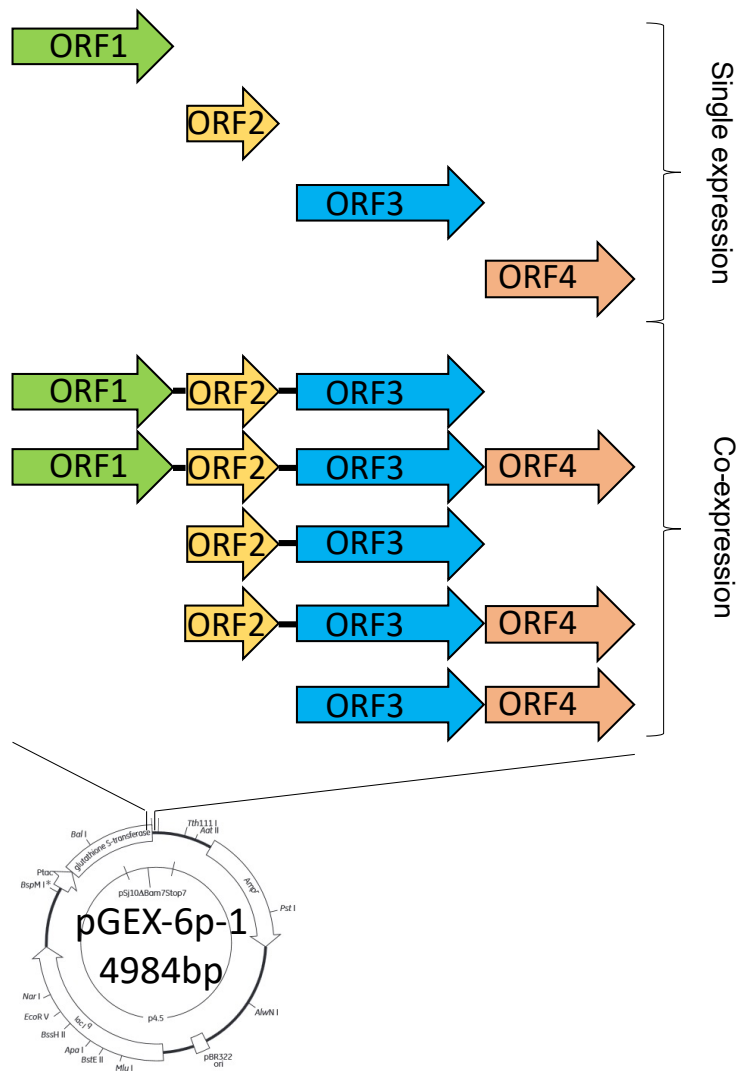

Figure S2. Expression vector constructs for single ORF expression or co-expression. The inserts were amplified by PCR and cloned into MCS of oGEX-6p-1.
